# Supplementary material for: Physicochemical Parameters and Alarming Coliform Count of the Potable Water of Eastern Himalayan State Sikkim: An Indication of Severe Fecal Contamination and Immediate Health Risk
Source: Front Public Health. 2019 Jul 10;7:174. doi: 10.3389/fpubh.2019.00174 (PMC6636254; doi:10.3389/fpubh.2019.00174)
Supplement: Supplementary Table S1 — Name of sample collection site with latitude and longitude. [file Table_1.XLSX]

## Sheet: Sheet1
District	Block	Lattitude	Longitude
East	Pakyong	27.2169	88.5908
East	Pakyong	27.21	88.59
East	Pakyong	27.204	88.57
East	Duga	27.205	88.5909
East	Rhenock	27.21	88.591
East	Regu	27.202	88.669
East	Ranka	27.318	88.552
East	Khamdong	27.275	88.485
East	Gangtok	27.269	88.586
East	Rakdong Tintek	27.384	88.506
West	Yuksom	27.3358	88.248
West	Soreng	27.155	88.474
West	Singlink	27.11	88.115
West	Malbasey	27.071	88.11
West	Soreng	27.1	88.12
West	Kaluk	27.185	88.3
West	Kaluk	27.133	88.143
West	Gyalshing	27.318	88.118
West	Dentam	27.14	88.063
West	Daramdin	27.064	88.112
South	Jorethang	27.154	88.314
South	Melli	27.129	88.342
South	Melli	27.135	88.368
South	Namchi	27.105	88.184
South	Namthang	27.154	88.35
South	Ravangla	27.17	88.21
South	Sikkip	27.265	88.309
South	Temi-tarku	27.145	88.261
South	Yangyang	27.221	88.264
South	Namchi	27.083	88.202
North	Chungthang	27.43	88.33
North	Passingdong	27.4755	88.506
North	Mangan	27.303	88.335
North	Kabi	27.42	88.618
North	Chungthang	27.662	88.718
North	Mangan	27.275	88.332
North	Passingdong	27.233	88.282
North	Passingdong	27.518	88.501
North	Mangan	27.29	88.315
North	Mangan	27.282	88.334
