# Supplementary material for: Physicochemical Parameters and Alarming Coliform Count of the Potable Water of Eastern Himalayan State Sikkim: An Indication of Severe Fecal Contamination and Immediate Health Risk
Source: Front Public Health. 2019 Jul 10;7:174. doi: 10.3389/fpubh.2019.00174 (PMC6636254; doi:10.3389/fpubh.2019.00174)
Supplement: Supplementary Table S4 — Principle Component analysis of statistical data of physicochemical parameters. [file Table_4.XLSX]

## Sheet: Sheet3
	Temperature	Total Dissolve Solid	Turbidity	Electric Conductivity	Total Hardness	Alkalinity	pH
East	20.8	41.5	2.604	184.3	25	26	7.18
South	18.8	41	2.124	188.1	35	25	6.52
North	18.6	13.5	1.819	96	21	24	7.01
West	20	39.5	1.503	177.2	37	23	7.1
		Temperature	Total Dissolve Solid	Turbidity	Electric Conductivity	Total Hardness	Alkalinity	pH
	Temperature	1
	Total Dissolve Solid	0.615471	1
	Turbidity	0.418204	0.333378	1
	Electric Conductivity	0.570474	0.99807	0.342707	1
	Total Hardness	0.0707003	0.698352	-0.388908	0.707055	1
	Alkalinity	0.323487	0.317771	0.993568	0.333989	-0.367689	1
	pH	0.672112	-0.13946	0.000155833	-0.199179	-0.405228	-0.108824	1
